# Supplementary material for: ZnIn2S4 with oxygen atom doping and surface sulfur vacancies for overall water splitting under visible light irradiation
Source: Royal Society of Chemistry journal article supplement (doi:10.1039/d2cy01794f), 2022-11-12
Supplement: d2cy01794f1.pdf [file d2cy01794f1.pdf]

## ZnIn<sub>2</sub>S<sub>4</sub> with oxygen atom doping and surface sulfur vacancies for overall water splitting under visible light irradiation

Haitong Jing <sup>a,c,d,#</sup>, Jun Ren <sup>a,#</sup>, Jianyong Yue <sup>a,c,d</sup>, Shiyao Liu <sup>a</sup>, Qifeng Liang <sup>a</sup>, Rong Wu <sup>c,d</sup>,  
Yawei Wang <sup>e</sup>, Zebo Fang <sup>a,\*</sup>, Huili Li <sup>b,\*</sup>, Shunhang Wei <sup>a,\*</sup>

<sup>a</sup> Zhejiang Engineering Research Center of MEMS, Shaoxing University, Shaoxing 312000, China

<sup>b</sup> College of Chemistry and Materials Science, Shanghai Normal University, Shanghai 200234, China.

<sup>c</sup> School of Physics Science and Technology, Xinjiang University, Urumqi 830017, China

<sup>d</sup> Xinjiang Key Laboratory of Solid State Physics and Devices, Xinjiang University, Urumqi 830017, China

<sup>e</sup> School of Chemistry and Chemical Engineering, Jiujiang University, Jiujiang 332005, China.

<sup>#</sup> Equal contributions

\*Corresponding author. E-mail addresses: csfzb@usx.edu.cn (Z. Fang); li\_huili@shnu.edu.cn (H. Li);

wshusx@163.com (S. Wei).

### Chemicals

Zinc acetate dihydrate (Aladdin; AR), Indium(III) chloride tetrahydrate (Macklin; AR), Thioacetamide (Macklin; AR), Citric acid (Aladdin; AR), Chromium(III) nitrate nonahydrate (Aladdin; AR), Ethanol absolute (SCR; AR), Chloroplatinic acid hexahydrate (Aladdin; AR).

### Characterization

An X-ray powder diffractometer (XRD, Empyrean) was used to measure the crystalline phases of the prepared samples. A SIGMA 300 field emission scanning electron microscope (FESEM) and a JEM-2100F high-resolution transmission electron microscope (HRTEM) were used to record their morphology and elemental distributions. Their elemental chemical states were examined using an X-ray photoelectron spectroscopy (XPS, Thermo Scientific K-Alpha+), and the binding energies calibrated to the C1s peak at 284.8 eV. A Shimadzu UV-3600 plus uv-vis spectrophotometer was used to obtain their diffuse reflection spectra (DRS). A Hitachi F-7000 fluorescence spectrophotometer was used to measure their photoluminescence (PL) spectra at room temperature (the excitation wave length was 360 nm). The time-resolved PL (TRPL) decay spectra were recorded using a FLUOROLOG-3-11 spectrofluorometer (the excitation wavelength was 370 nm; detection wavelength was 518 nm; bandwidth was 1.5 nm). Electron paramagnetic resonance (EPR) spectra were

recorded using a Bruker EMXPLUS at room temperature. The molecular structural information in the range of 400 - 4000  $\text{cm}^{-1}$  was measured using a NEXUS870 fourier transform infrared spectrophotometer (FTIR). The Brunauer-Emmett-Teller (BET) surface area was measured using a Micromeritics ASAP2460 analyzer.

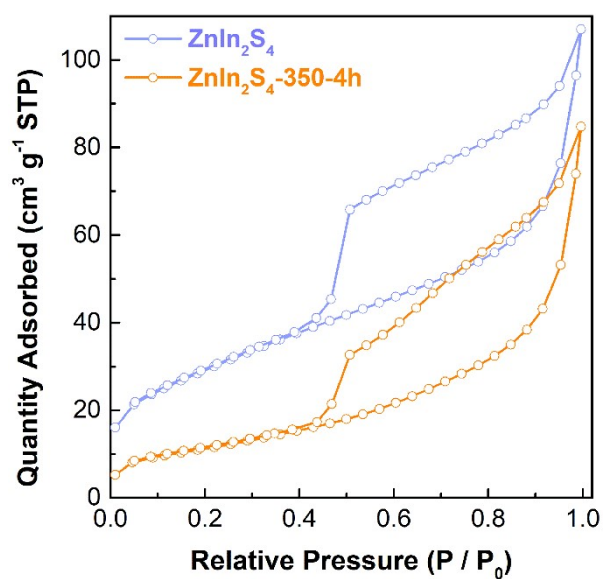

Fig. S1 Nitrogen adsorption-desorption isotherms of the initial ZnIn<sub>2</sub>S<sub>4</sub> and ZnIn<sub>2</sub>S<sub>4</sub>-350-4h samples.

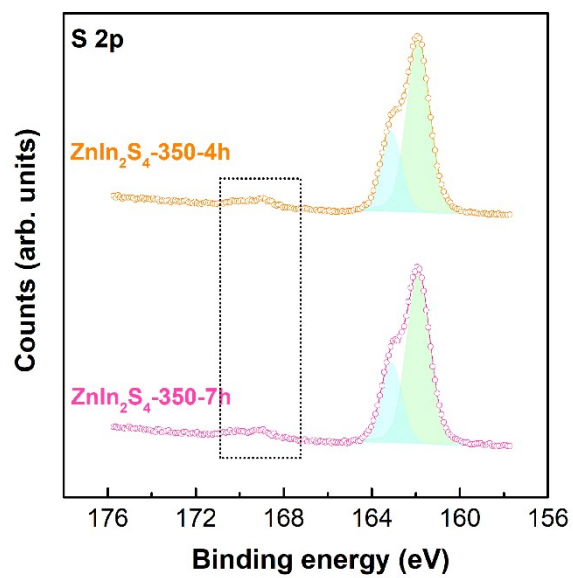

Fig. S2 S 2p spectra of the  $\text{ZnIn}_2\text{S}_4\text{-350-4h}$  and  $\text{ZnIn}_2\text{S}_4\text{-350-7h}$  samples.

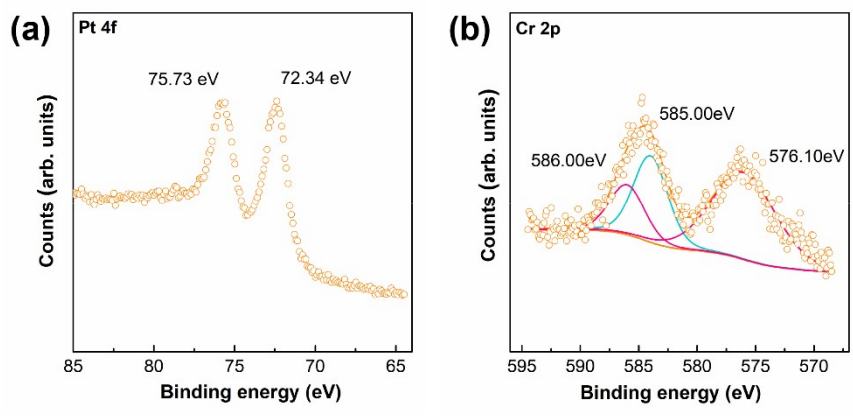

Fig. S3 XPS spectra of Pt 4f peaks (a) and Cr 2p peaks (b).

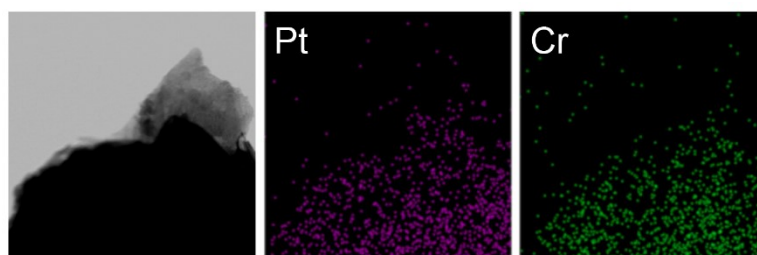

Fig.S4 TEM elemental mappings of Pt/Cr cocatalysts loaded on the ZnIn<sub>2</sub>S<sub>4</sub>-350-4h sample.

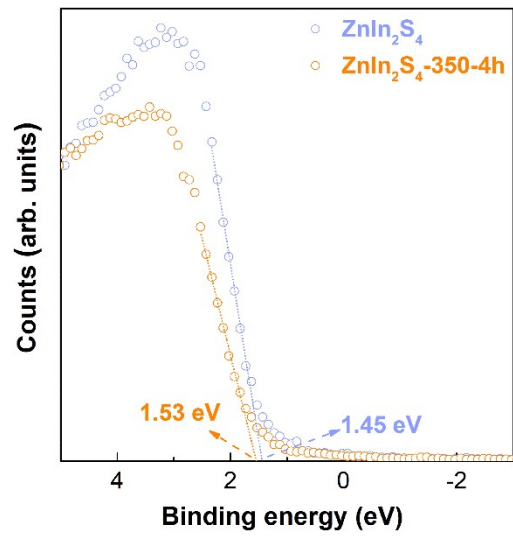

Fig. S5 XPS valence band spectra of samples

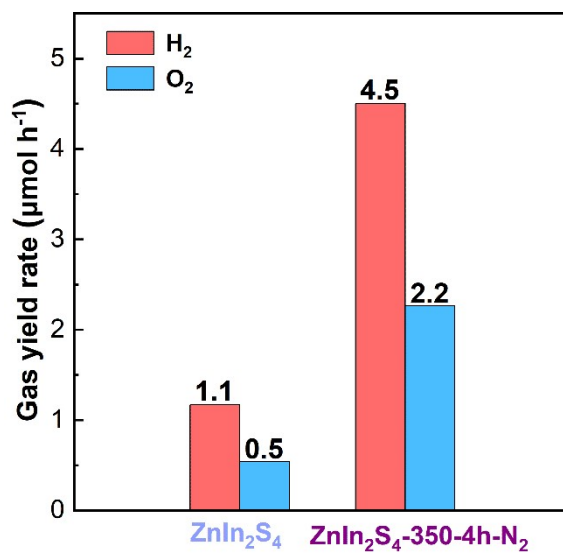

Fig. S6 Photocatalytic overall water splitting rates of the as-prepared samples.

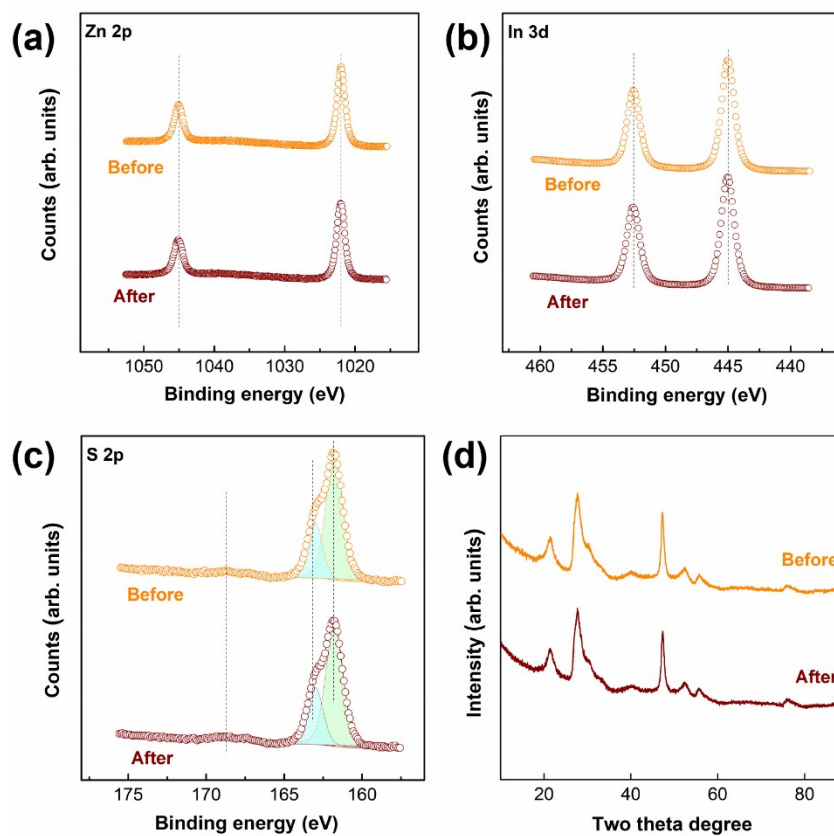

Fig. S7 XPS spectra ((a) Zn 2p peaks, (b) In 3d peaks, (c) S 2p peaks) and XRD patterns (d) of the samples before and after photocatalytic overall water splitting.



Table S1 STH efficiency of single-phase ZnIn<sub>2</sub>S<sub>4</sub> reported in literatures.

| Photocatalysts                                     | Activity measurement             |                                           |                                           |                   | Ref.             |
|----------------------------------------------------|----------------------------------|-------------------------------------------|-------------------------------------------|-------------------|------------------|
|                                                    | Illumination                     | H <sub>2</sub><br>( $\mu\text{mol/g/h}$ ) | O <sub>2</sub><br>( $\mu\text{mol/g/h}$ ) | STH<br>efficiency |                  |
| d <sub>Zni</sub> -ZnIn <sub>2</sub> S <sub>4</sub> | 300W Xe lamp<br>( $\geq 420$ nm) | 74.3                                      | 35.4                                      | /                 | [1]              |
| Al-ZnIn <sub>2</sub> S <sub>4</sub>                | 300W Xe lamp<br>( $\geq 420$ nm) | 77.2                                      | 35.3                                      | /                 | [2]              |
| Ag-ZnIn <sub>2</sub> S <sub>4</sub>                | 300W Xe lamp<br>( $> 420$ nm)    | 56.6                                      | 29.1                                      | 0.003%            | [3]              |
| ZnIn <sub>2</sub> S <sub>4</sub> -800              | 300W Xe lamp<br>( $\geq 420$ nm) | 68.0                                      | 31.0                                      | 0.021%            | [4]              |
| ZnIn <sub>2</sub> S <sub>4</sub> -350-4h           | 300W Xe lamp<br>( $\geq 420$ nm) | 270.2                                     | 130.0                                     | <b>0.035%</b>     | <b>This work</b> |

References:

- 1 B. Sun, J. Bu, X. Chen, D. Fan, S. Li, Z. Li, W. Zhou and Y. Du, *Chem. Eng. J.*, 2022, **435**, 135074.
- 2 B. Sun, D. Fan, X. Chen, Z. Li, W. Zhou and Y. Du, *Mater. Chem. Front.*, 2022, **6**, 1795-1802.
- 3 R. Pan, M. Hu, J. Liu, D. Li, X. Wan, H. Wang, Y. Li, X. Zhang, X. Wang and J. Jiang, *Nano Lett.*, 2021, **21**, 6228-6236.
- 4 H. Jing, G. Xu, B. Yao, J. Ren, Y. Wang, Z. Fang, Q. Liang, R. Wu and S. Wei, *ACS Appl. Energy Mater.*, 2022, **5**, 10187-10195.
